# Supplementary material for: Efficient dimerization of perfluoroolefin with strong nucleophilic ionic liquid catalysts by adjusting the interaction of anions and cations
Source: Royal Society of Chemistry journal article supplement (doi:10.1039/d3gc00613a), 2023-01-01
Supplement: d3gc00613a1.pdf [file d3gc00613a1.pdf]

## Supporting Information

### Efficient Dimerization of Perfluoroolefin with Strong Nucleophilic Ionic Liquids Catalysts by Adjusting the Interaction of Anion and Cation

Shiqi Huang <sup>a, b</sup>, Xianglei Meng <sup>b, c, d \*</sup>, Yanzhao Gao <sup>a, b</sup>, Minmin Liu <sup>b, e</sup>, Junjie Zhang <sup>b, e</sup>, Yu Zhou <sup>a</sup>, Yuting Song <sup>b, c, d \*</sup>, Yanyan Diao <sup>b, c, d \*</sup>

<sup>a</sup> College of Chemical Engineering, Nanjing Tech University, Nanjing 210009, China

<sup>b</sup> Beijing Key Laboratory of Ionic Liquids Clean Process, CAS Key Laboratory of Green Process and Engineering, State Key Laboratory of Multiphase Complex Systems, Institute of Process Engineering, Chinese Academy of Sciences, Beijing, 100190, China

<sup>c</sup> College of Chemical and Engineering, University of Chinese Academy of Sciences, Beijing 100049, China

<sup>d</sup> Innovation Academy for Green Manufacture, Chinese Academy of Sciences, Beijing 100190, China

<sup>e</sup> College of Chemical Engineering, Shenyang University of Chemical Technology, Shenyang 110142, China

\*Corresponding Author: Yanyan Diao, Yuting Song, Xianglei Meng

Tel/Fax: 86-10-82544875, E-mail: [yydiao@ipe.ac.cn](mailto:yydiao@ipe.ac.cn), [yutingsong@ipe.ac.cn](mailto:yutingsong@ipe.ac.cn), [xlmeng@ipe.ac.cn](mailto:xlmeng@ipe.ac.cn)

#### Characterizations of IL

FT-IR, NMR and ESI-MS, as shown in Figure S1-S11, were carried out to identify the structures of the prepared ILs. The results of the chosen catalyst, [C<sub>n</sub>mmim][SCN], [C<sub>4</sub>Py][SCN] and [N<sub>4,4,4,4</sub>][SCN] are mainly displayed here.

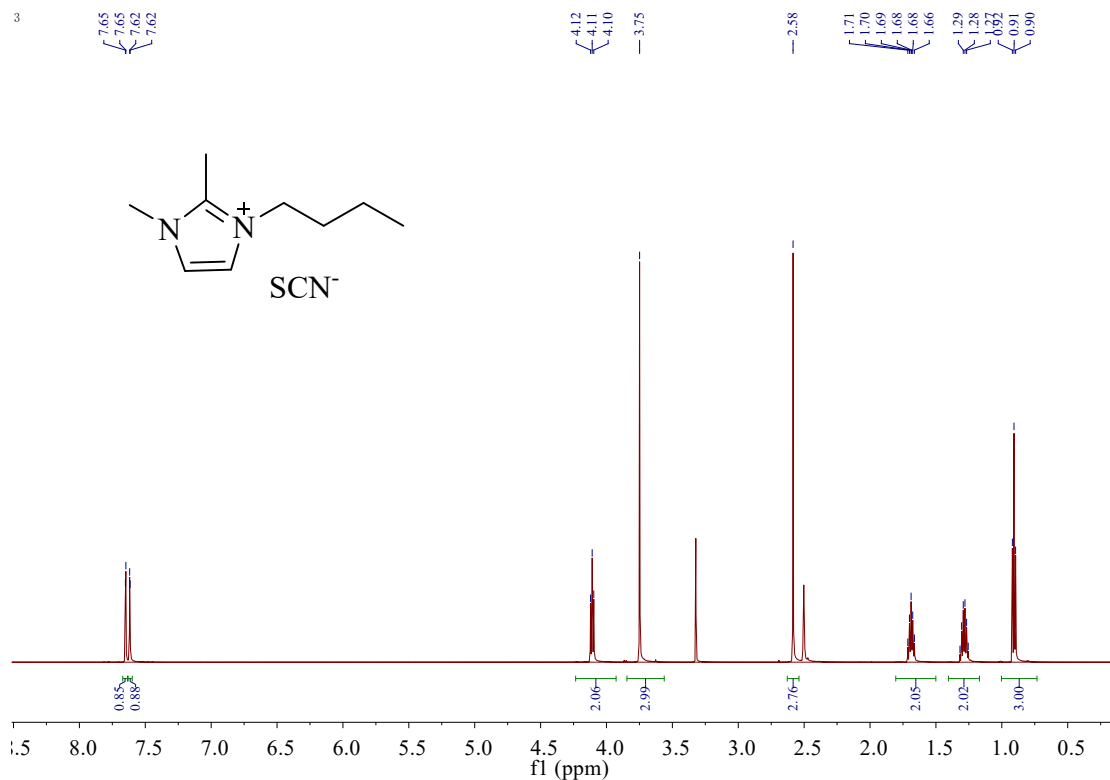

Fig. S1 The  $^1\text{H}$  NMR spectrum of  $[\text{C}_4\text{mmim}][\text{SCN}]$  (DMSO)

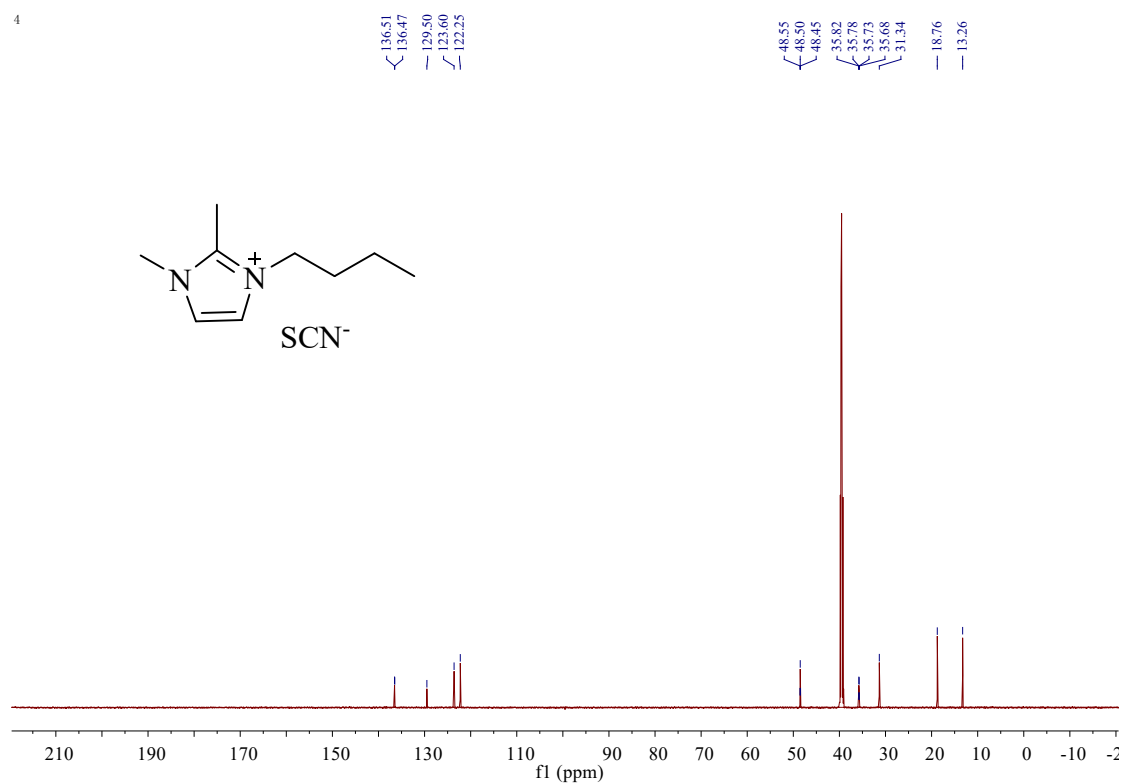

Fig. S2 The  $^{13}\text{C}$  NMR spectrum of  $[\text{C}_4\text{mmim}][\text{SCN}]$  (DMSO)

$[\text{C}_4\text{mmim}][\text{SCN}]$ :  $^1\text{H}$  NMR (600 MHz, DMSO)  $\delta$  7.65 (d,  $J = 2.1$  Hz, 1H), 7.62 (d,  $J = 2.0$  Hz, 1H), 4.11 (t,  $J = 7.3$  Hz, 2H), 3.75 (s, 3H), 2.58 (s, 3H), 1.76 – 1.59 (m,

2H), 1.35 – 1.19 (m, 2H), 0.91 (t, J = 7.4 Hz, 3H). <sup>13</sup>C NMR (151 MHz, DMSO) δ 137.00, 136.96, 129.99, 124.09, 122.74, 49.04, 48.99, 48.95, 36.27, 36.22, 31.83, 19.25, 13.75.

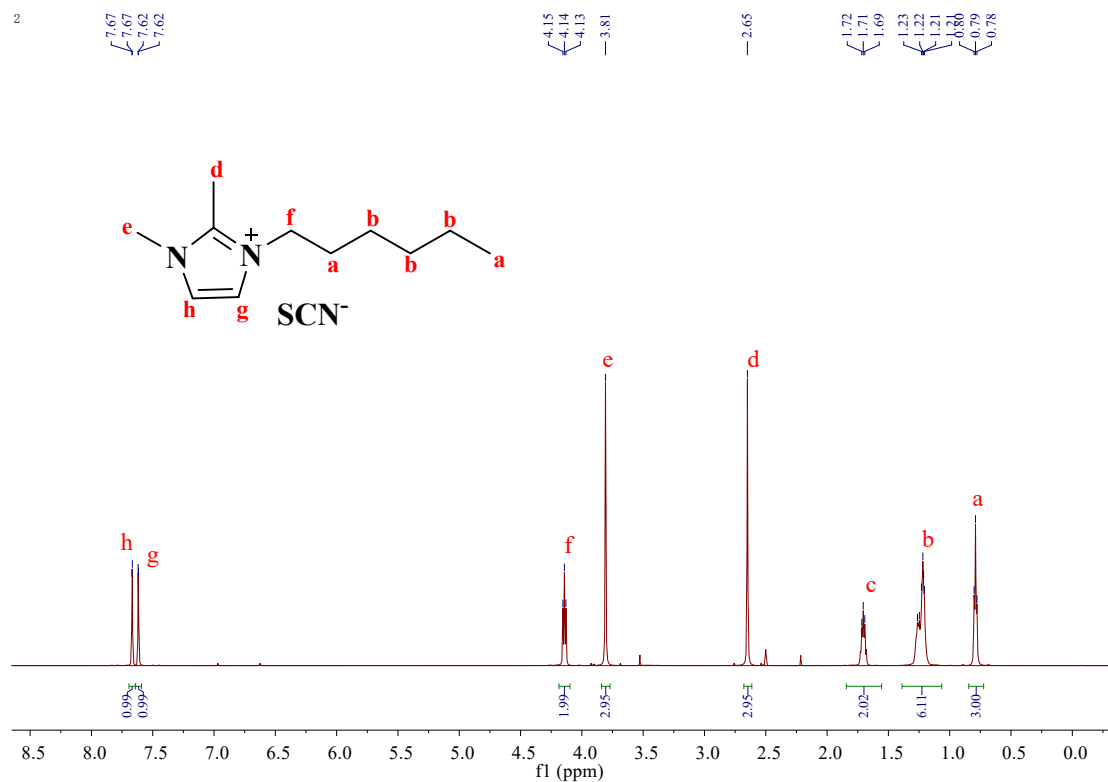

Fig. S3 The <sup>1</sup>H NMR spectrum of [C<sub>6</sub>mmim][SCN] (DMSO)

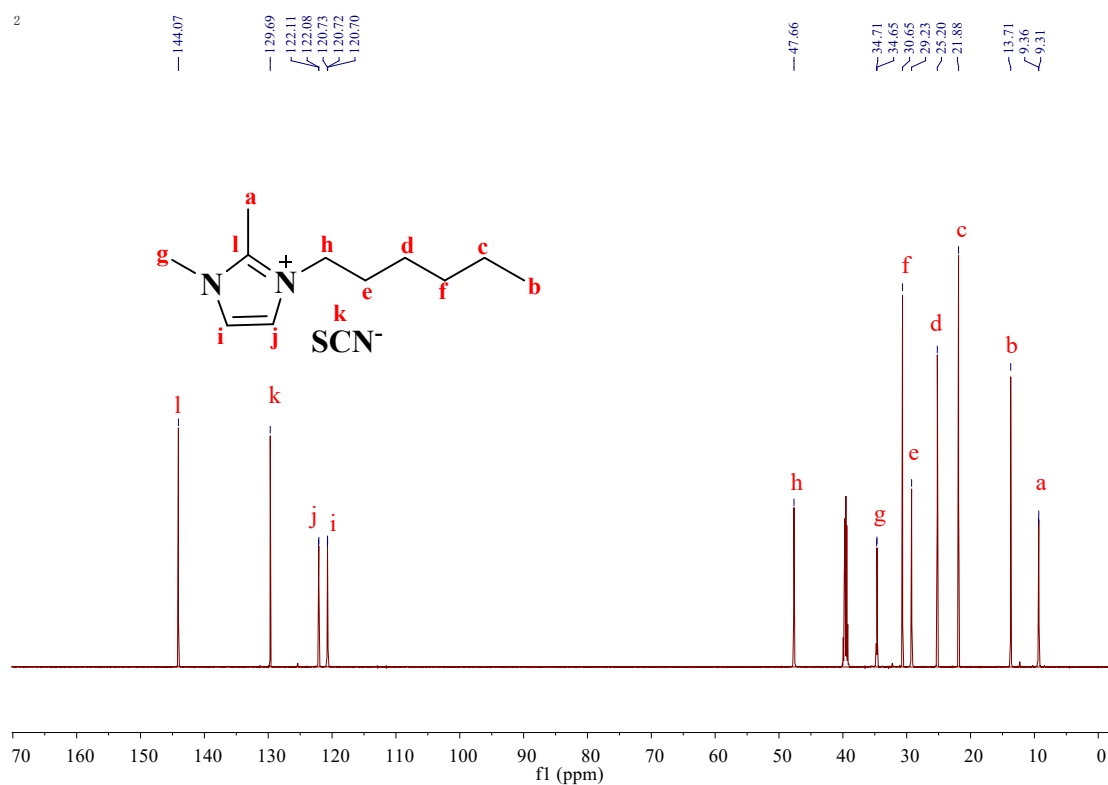

Fig. S4 The  $^{13}\text{C}$  NMR spectrum of  $[\text{C}_6\text{mmim}][\text{SCN}]$  (DMSO)

$[\text{C}_6\text{mmim}][\text{SCN}]$ :  $^1\text{H}$  NMR (600 MHz, DMSO)  $\delta$  7.67 (d,  $J = 2.0$  Hz, 1H), 7.62 (d,  $J = 1.9$  Hz, 1H), 4.14 (t,  $J = 7.4$  Hz, 2H), 3.81 (s, 3H), 2.65 (s, 3H), 1.84 – 1.56 (m, 2H), 1.39 – 1.06 (m, 6H), 0.79 (t,  $J = 6.9$  Hz, 3H).  $^{13}\text{C}$  NMR (151 MHz, DMSO)  $\delta$  144.07, 129.69, 122.11, 122.08, 120.73, 120.72, 120.70, 120.63, 47.71, 47.66, 47.60, 34.76, 34.71, 34.65, 34.60, 30.65, 29.23, 25.20, 21.88, 13.71, 9.40, 9.36, 9.31, 9.27.

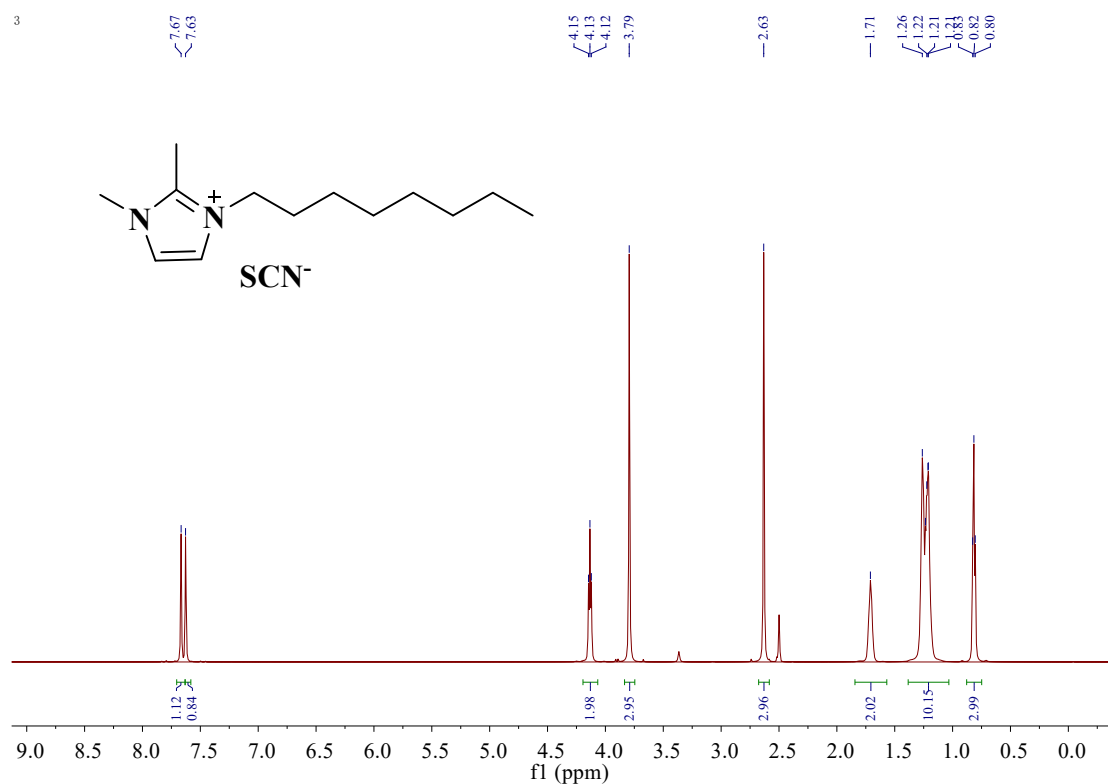

Fig. S5 The  $^1\text{H}$  NMR spectrum of  $[\text{C}_8\text{mmim}][\text{SCN}]$  (DMSO)

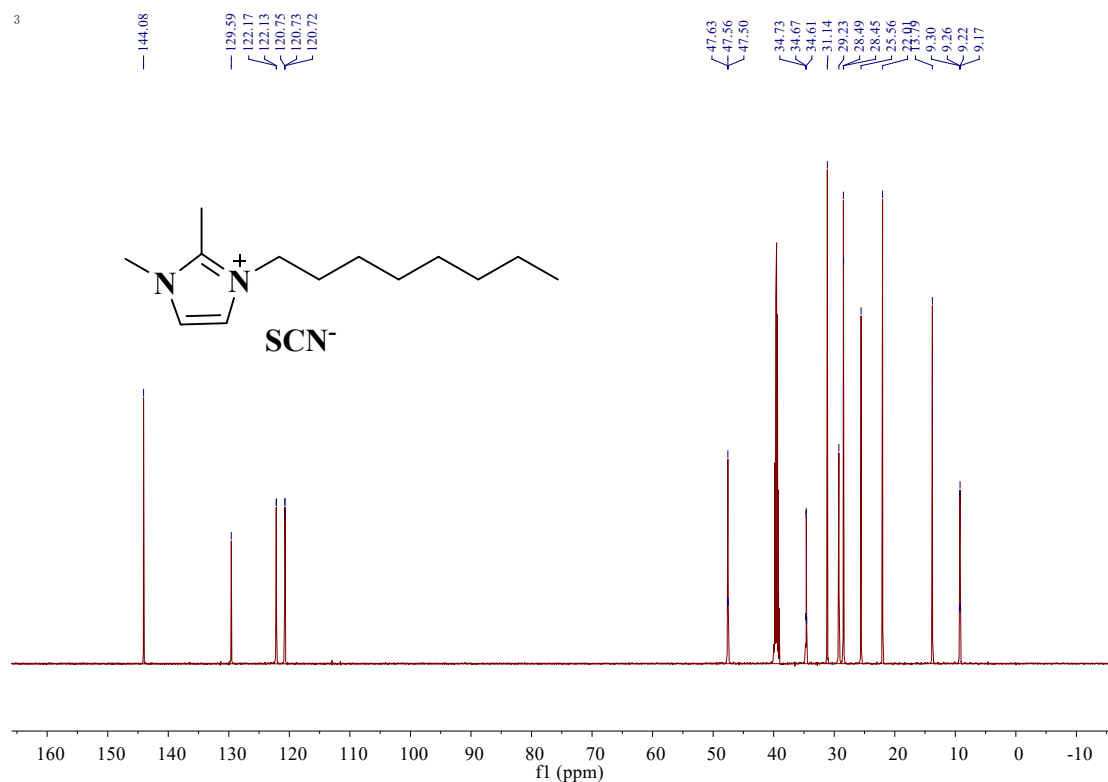

Fig. S6 The <sup>13</sup>C NMR spectrum of [C<sub>8</sub>mmim][SCN] (DMSO)

[C<sub>8</sub>mmim][SCN]: <sup>1</sup>H NMR (600 MHz, DMSO) δ 7.67 (s, 1H), 7.63 (s, 1H), 4.13 (t, J = 7.3 Hz, 2H), 3.79 (s, 3H), 2.63 (s, 3H), 1.71 (s, 2H), 1.38 – 1.03 (m, 10H), 0.82 (t, J = 6.6 Hz, 3H). <sup>13</sup>C NMR (151 MHz, DMSO) δ 144.08, 129.59, 122.17, 122.13, 120.75, 120.73, 120.72, 47.63, 47.56, 47.50, 34.73, 34.67, 34.61, 34.56, 31.14, 29.23, 28.49, 28.45, 25.56, 22.01, 13.79, 9.30, 9.26, 9.22, 9.17.

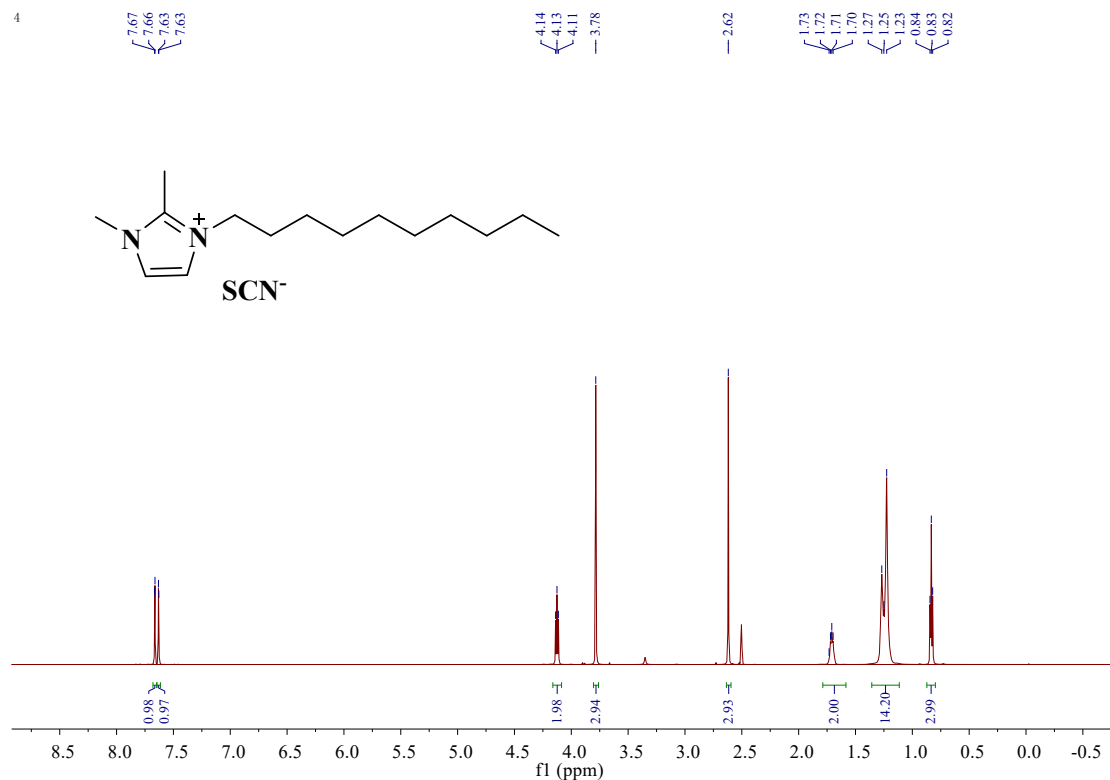

Fig. S7 The  $^1\text{H}$  NMR spectrum of  $[\text{C}_{10}\text{mmim}][\text{SCN}]$  (DMSO)

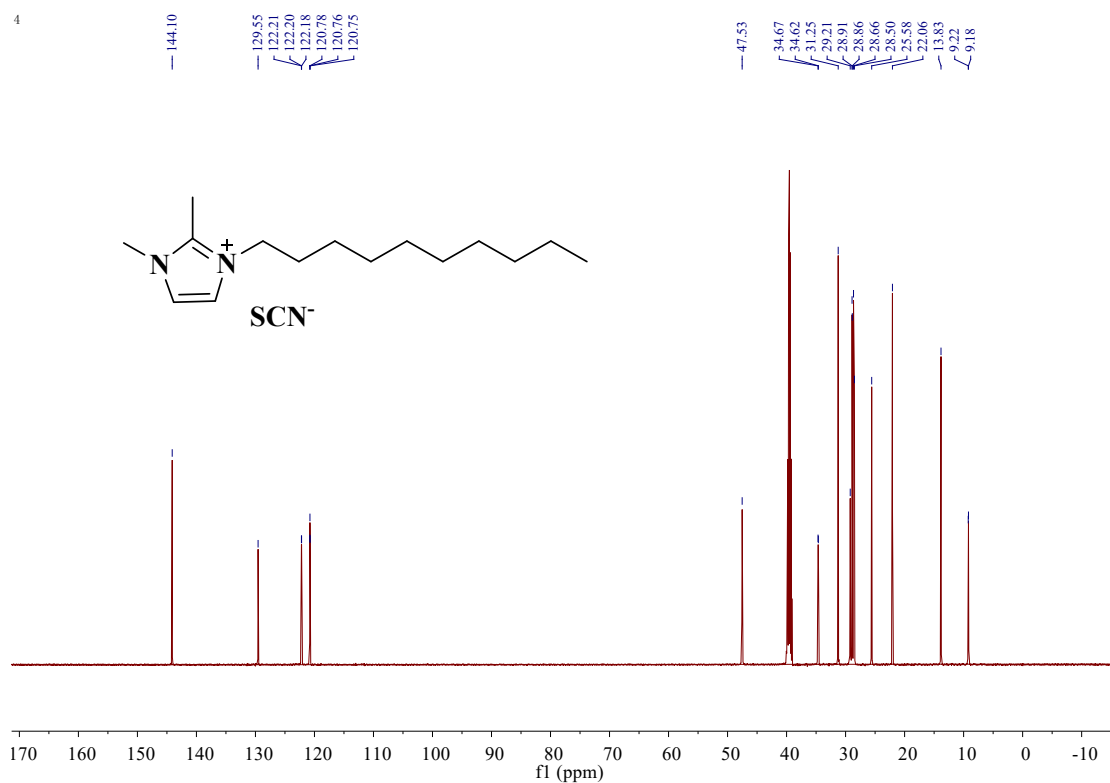

Fig. S8 The  $^{13}\text{C}$  NMR spectrum of  $[\text{C}_{10}\text{mmim}][\text{SCN}]$  (DMSO)

$[\text{C}_{10}\text{mmim}][\text{SCN}]$ :  $^1\text{H}$  NMR (600 MHz, DMSO)  $\delta$  7.66 (d,  $J = 2.1$  Hz, 1H), 7.63 (d,  $J = 2.0$  Hz, 1H), 4.13 (t,  $J = 7.4$  Hz, 2H), 3.78 (s, 3H), 2.62 (s, 3H), 1.71

(dd,  $J = 14.0, 7.0$  Hz, 2H), 1.36 – 1.11 (m, 14H), 0.83 (t,  $J = 7.0$  Hz, 3H).  $^{13}\text{C}$  NMR (151 MHz, DMSO)  $\delta$  144.10, 129.55, 122.21, 122.20, 122.18, 120.78, 120.76, 120.75, 47.53, 34.67, 34.62, 31.25, 29.21, 28.91, 28.86, 28.66, 28.50, 25.58, 22.06, 13.83, 9.22, 9.18.

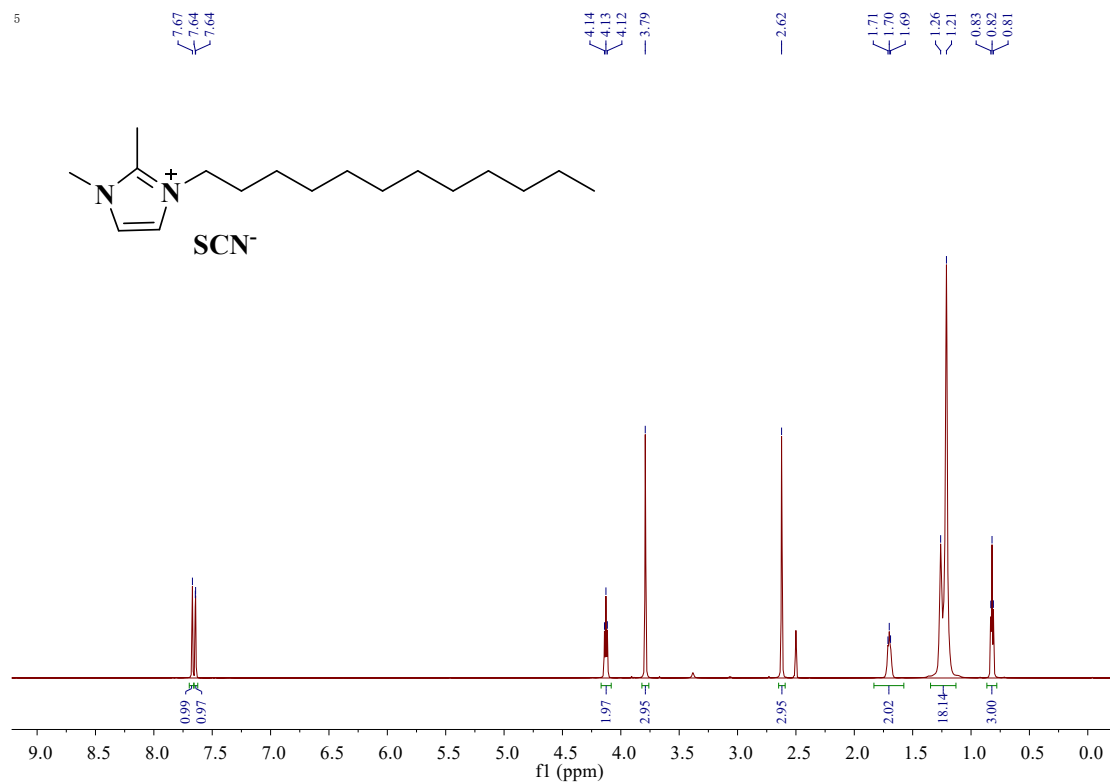

Fig. S9 The  $^1\text{H}$  NMR spectrum of  $[\text{C}_{12}\text{mmim}][\text{SCN}]$  (DMSO)

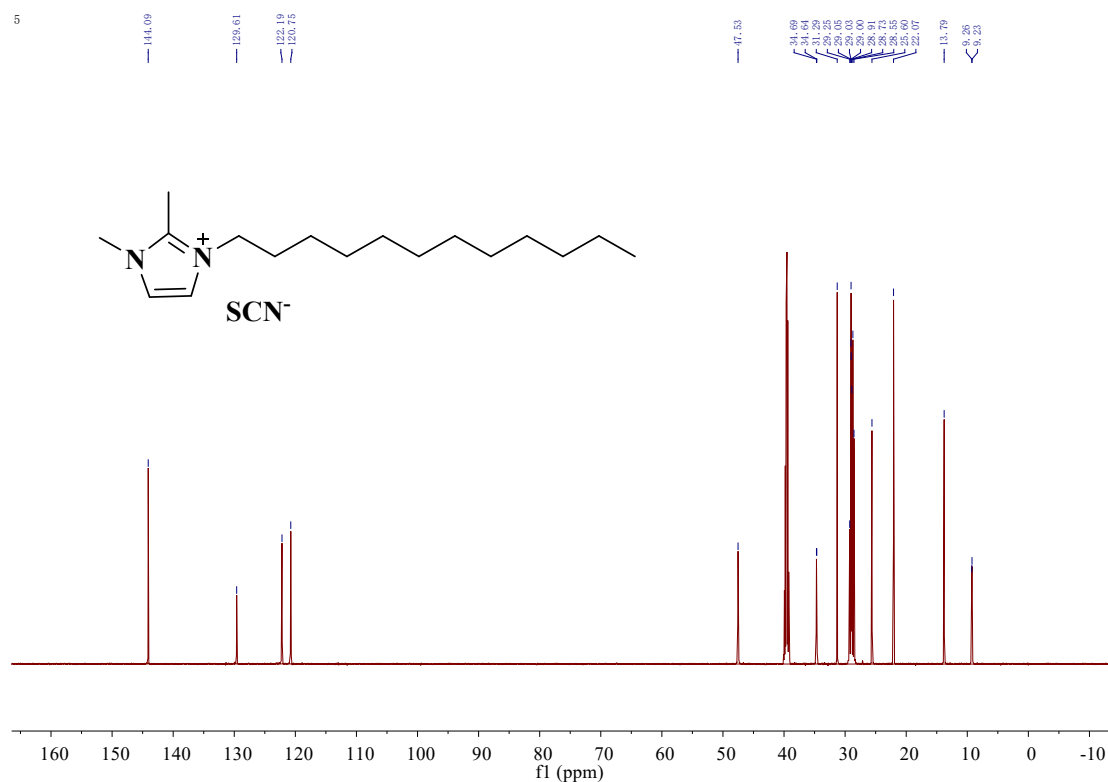

Fig. S10 The <sup>13</sup>C NMR spectrum of [C<sub>12</sub>mmim][SCN] (DMSO)

[C<sub>12</sub>mmim][SCN]: <sup>1</sup>H NMR (600 MHz, DMSO) δ 7.67 (s, 1H), 7.64 (d, J = 1.4 Hz, 1H), 4.13 (t, J = 7.4 Hz, 2H), 3.79 (s, 3H), 2.62 (s, 3H), 1.83 – 1.58 (m, 2H), 1.24 (d, J = 29.9 Hz, 18H), 0.82 (t, J = 6.7 Hz, 3H). <sup>13</sup>C NMR (151 MHz, DMSO) δ 144.09, 129.61, 122.19, 120.75, 47.53, 34.69, 34.64, 31.29, 29.25, 29.05, 29.03, 29.00, 28.91, 28.73, 28.55, 25.60, 22.07, 13.79, 9.26, 9.23.



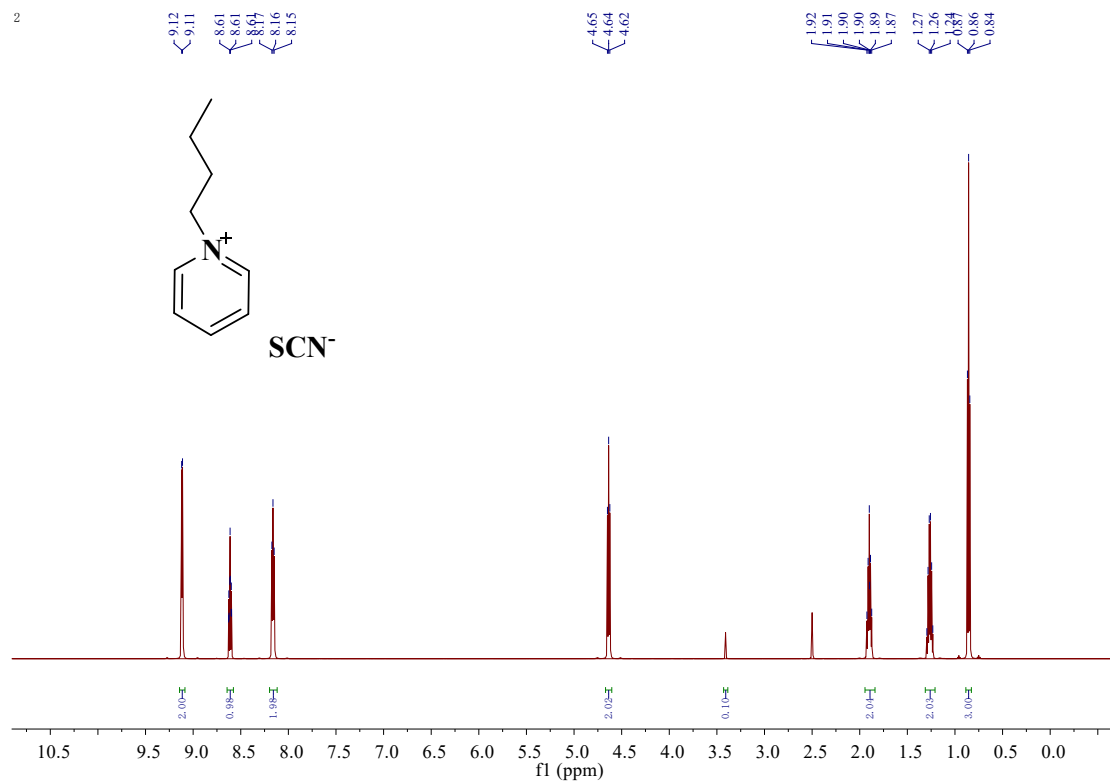

Fig. S11 The  $^1\text{H}$  NMR spectrum of  $[\text{C}_4\text{Py}][\text{SCN}]$  (DMSO)

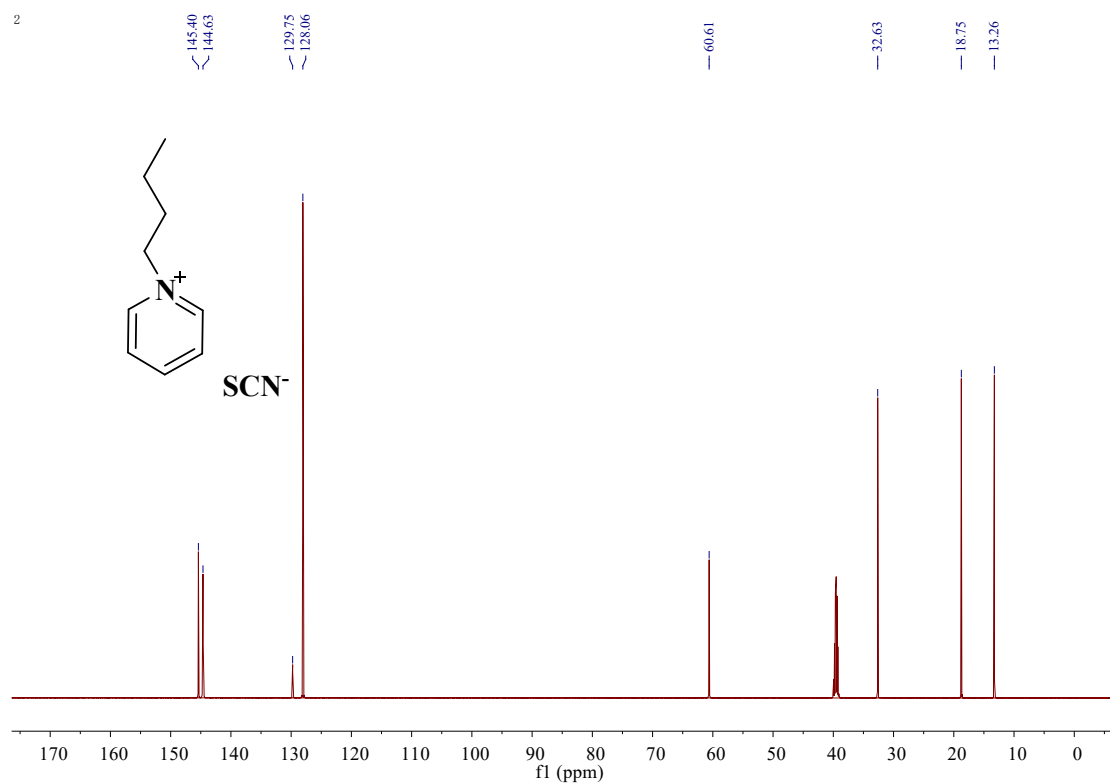

Fig. S12 The  $^{13}\text{C}$  NMR spectrum of  $[\text{C}_4\text{Py}][\text{SCN}]$  (DMSO)

$[\text{C}_4\text{Py}][\text{SCN}]$ :  $^1\text{H}$  NMR (600 MHz, DMSO)  $\delta$  9.12 (d,  $J = 5.5$  Hz, 2H), 8.61 (tt,  $J = 7.8, 1.2$  Hz, 1H), 8.20 – 8.12 (m, 2H), 4.67 – 4.60 (m, 2H), 3.41 (s, 1H),

1.94 – 1.84 (m, 2H), 1.31 – 1.21 (m, 2H), 0.86 (t, J = 7.4 Hz, 3H). <sup>13</sup>C NMR (151 MHz, DMSO) δ 145.40, 144.63, 129.75, 128.06, 60.61, 32.63, 18.75, 13.26.

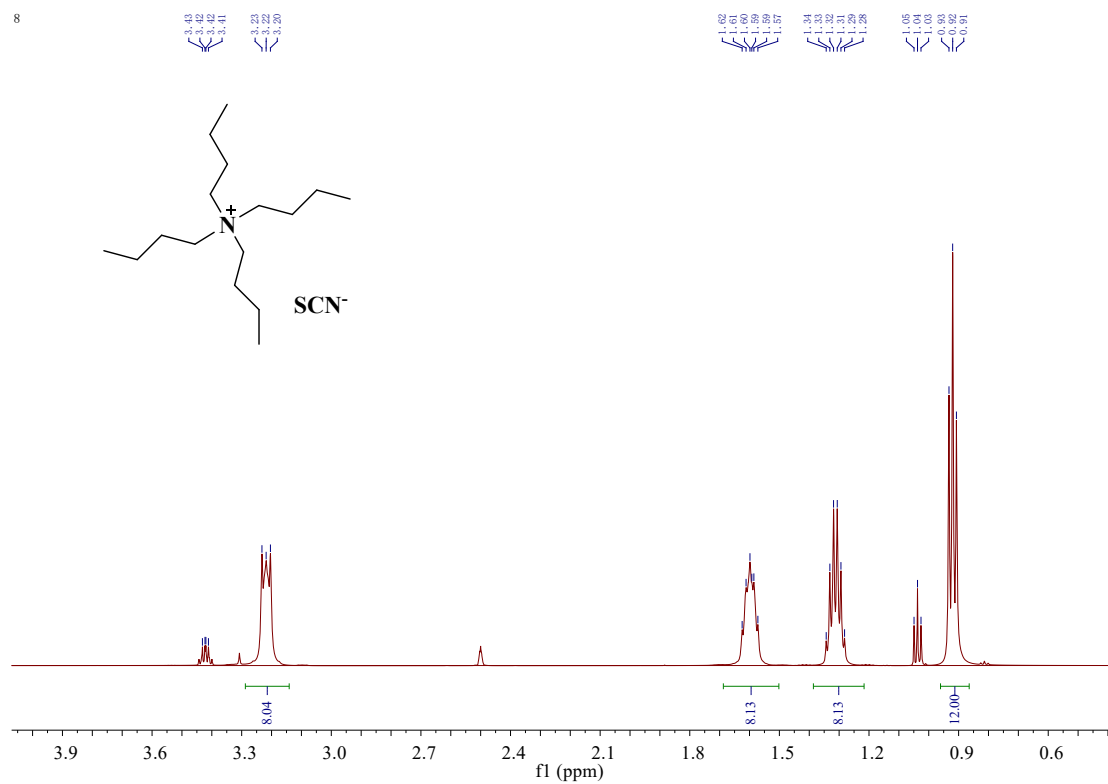

Fig. S13 The <sup>1</sup>H NMR spectrum of [N<sub>4,4,4,4</sub>][SCN] (DMSO)

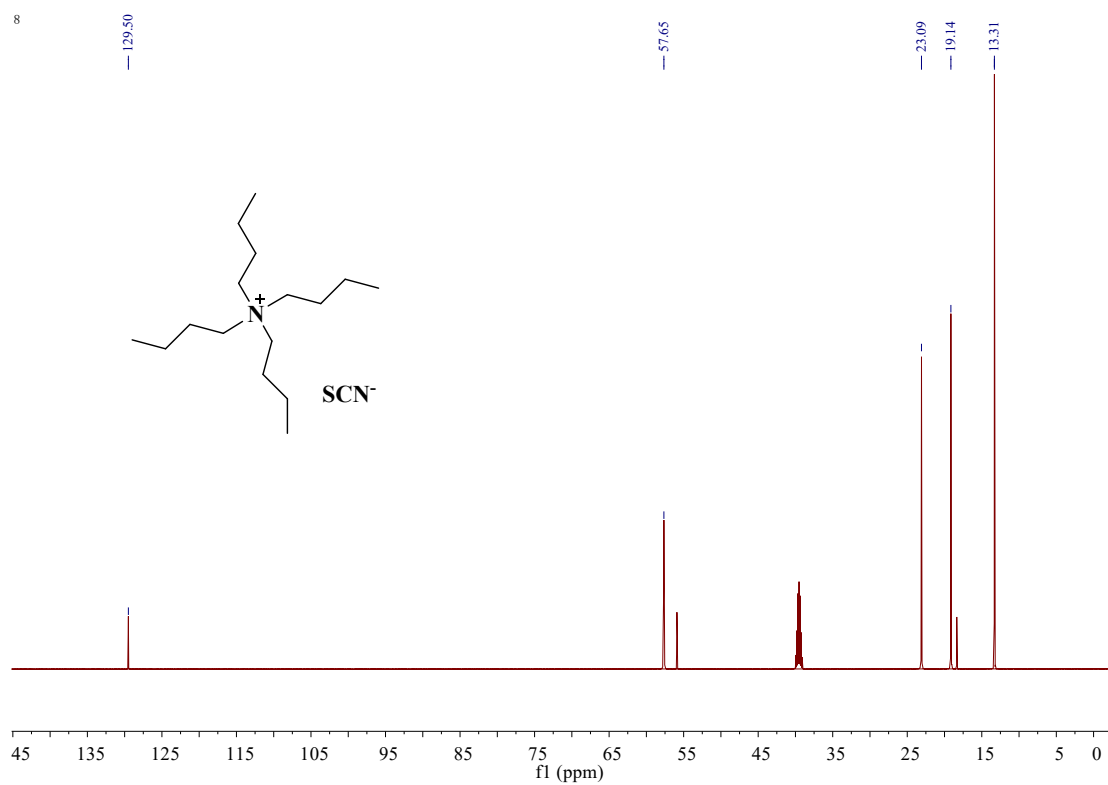

Fig. S14 The  $^{13}\text{C}$  NMR spectrum of  $[\text{N}_{4,4,4,4}][\text{SCN}]$  (DMSO)

$[\text{N}_{4,4,4,4}][\text{SCN}]$ :  $^1\text{H}$  NMR (600 MHz, DMSO)  $\delta$  4.35 (t,  $J = 5.1$  Hz, 1H), 3.29 – 3.14 (m, 8H), 1.60 (dt,  $J = 12.2, 8.0$  Hz, 8H), 1.39 – 1.22 (m, 8H), 0.92 (t,  $J = 7.5$  Hz, 12H).  $^{13}\text{C}$  NMR (151 MHz, DMSO)  $\delta$  130.43, 58.05, 56.40, 23.49 (d,  $J = 15.8$  Hz), 19.83 – 18.97, 18.53, 13.88 – 12.97 (m).  $^{13}\text{C}$  NMR (151 MHz, DMSO)  $\delta$  129.50, 57.65, 23.09, 19.14, 13.31.

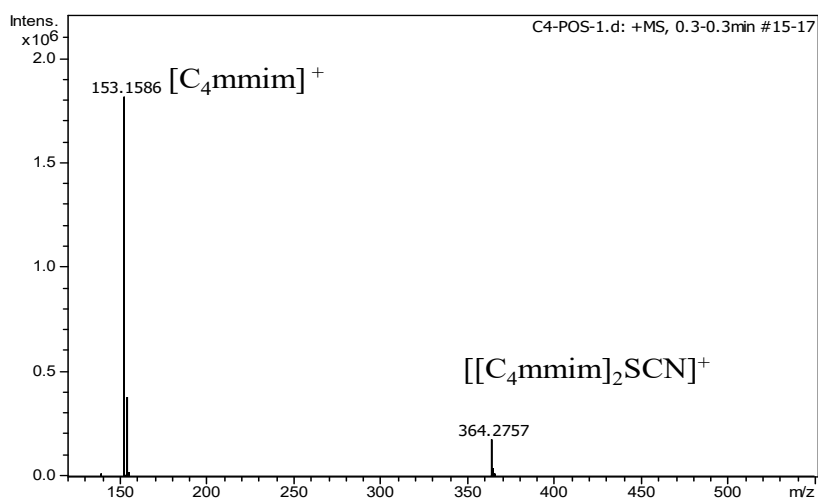

Fig. S15 The ESI-MS spectrum of  $[\text{C}_4\text{mmim}][\text{SCN}]$

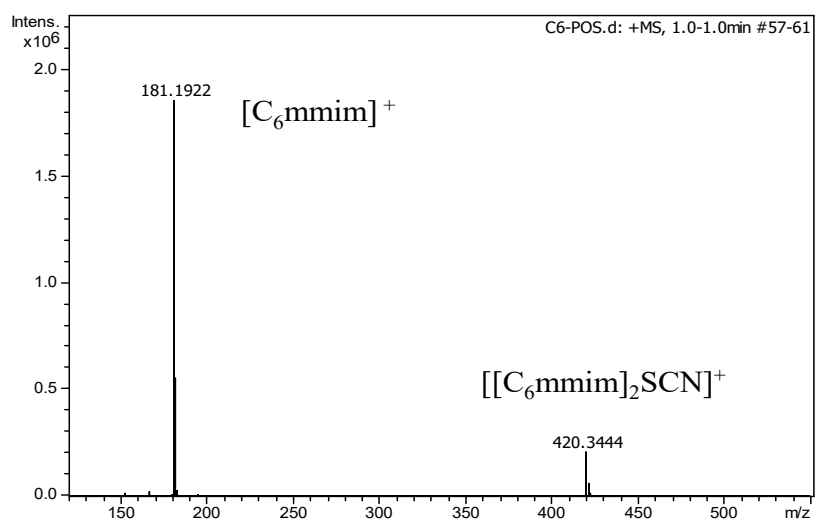

Fig. S16 The ESI-MS spectrum of  $[\text{C}_6\text{mmim}][\text{SCN}]$

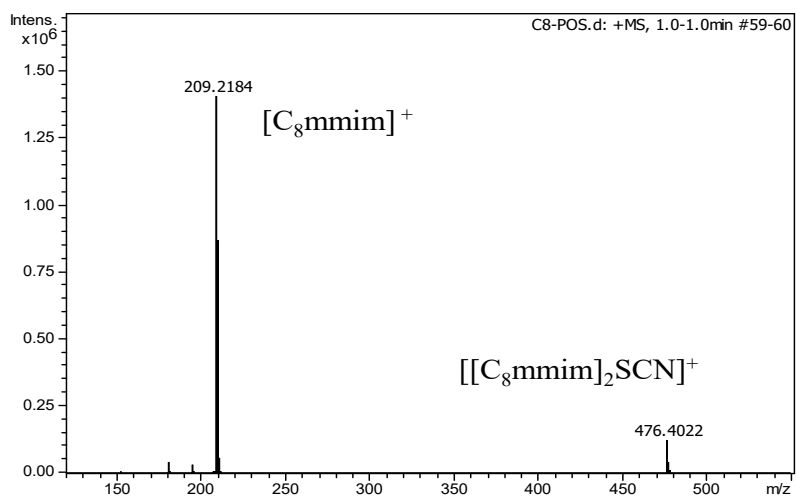

Fig. S17 The ESI-MS spectrum of  $[\text{C}_8\text{mmim}][\text{SCN}]$

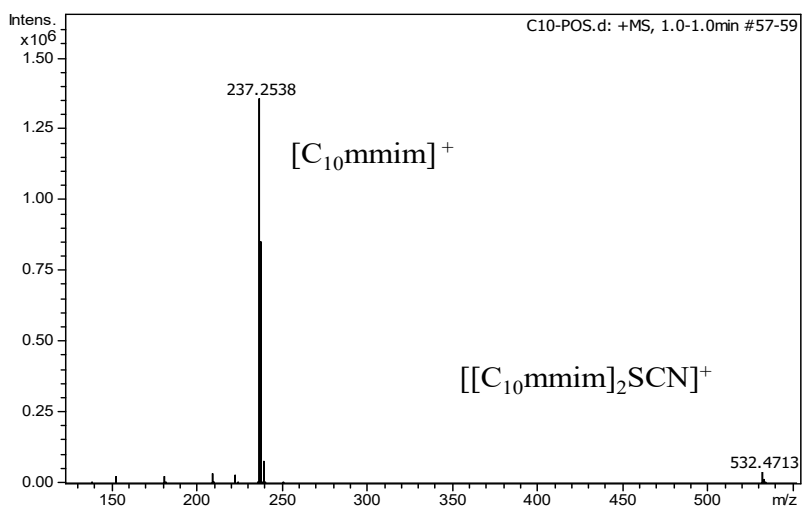

Fig. S18 The ESI-MS spectrum of  $[\text{C}_{10}\text{mmim}][\text{SCN}]$

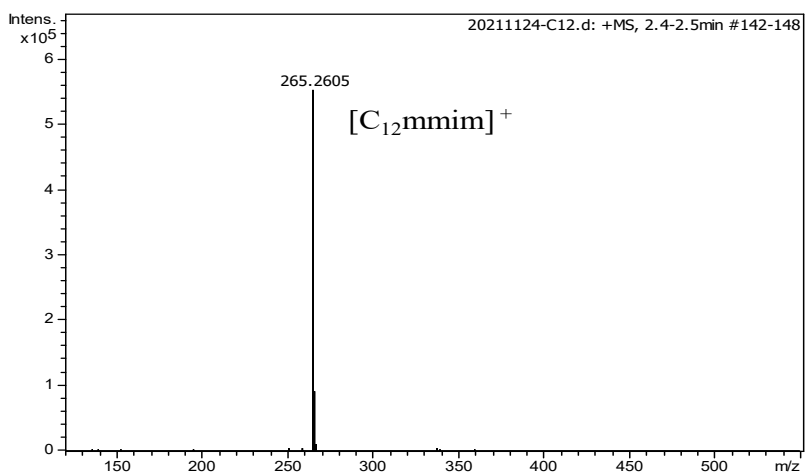

Fig. S19 The ESI-MS spectrum of [C<sub>12</sub>mim][SCN]

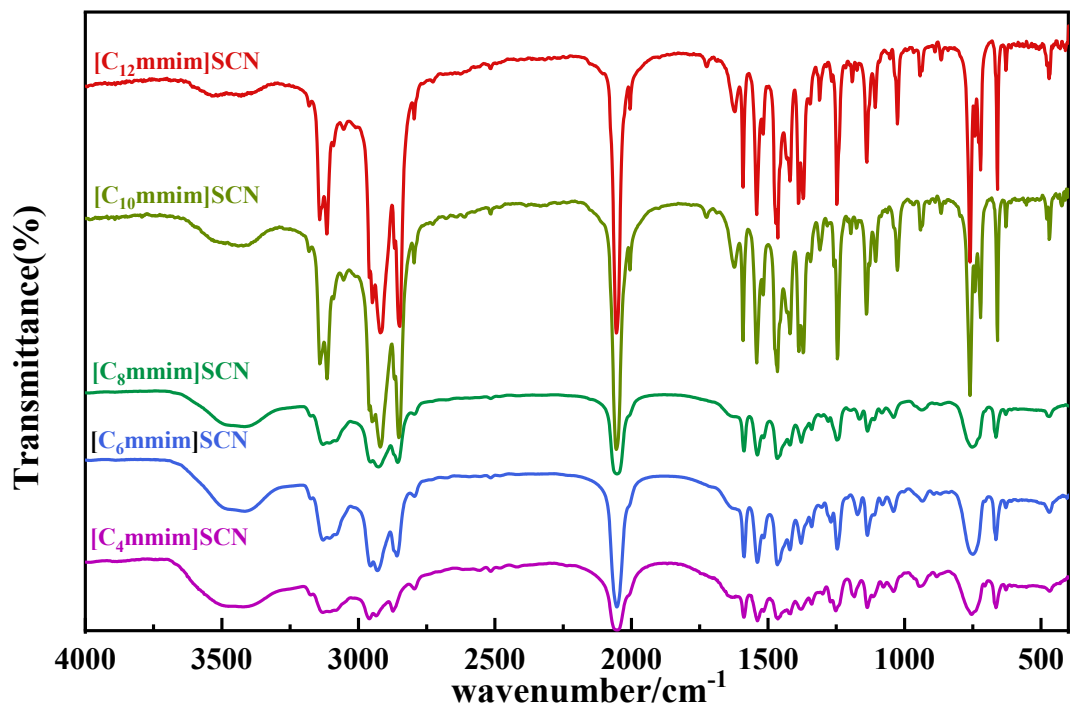

Fig. S20. FT-IR spectra of trisubstituted thiocyanate ionic liquid

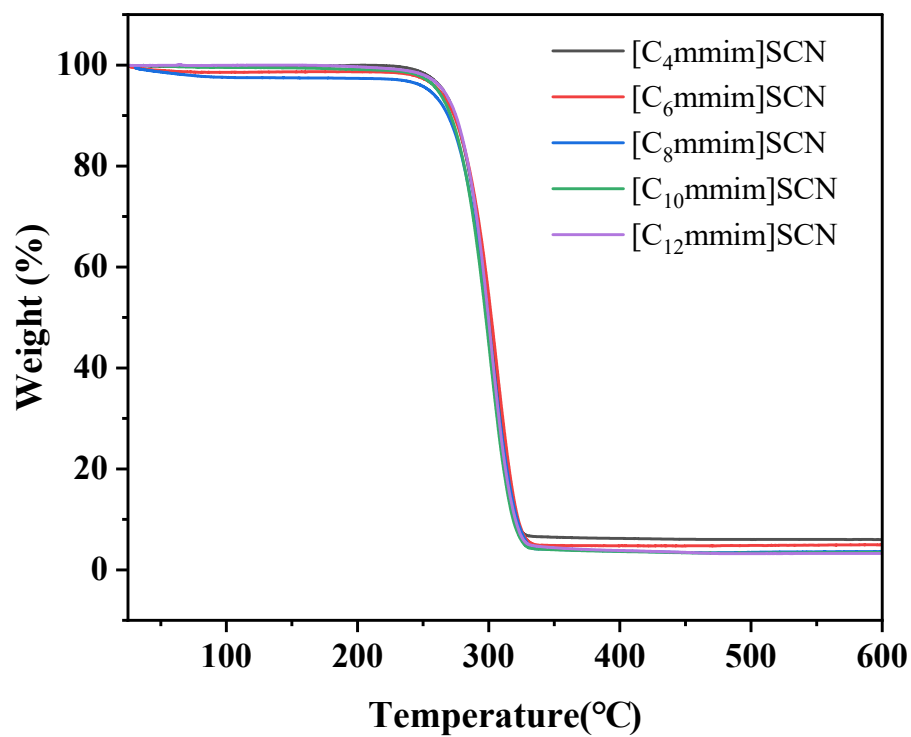

Fig. S21 TGA curves of trisubstituted thiocyanate ionic liquid

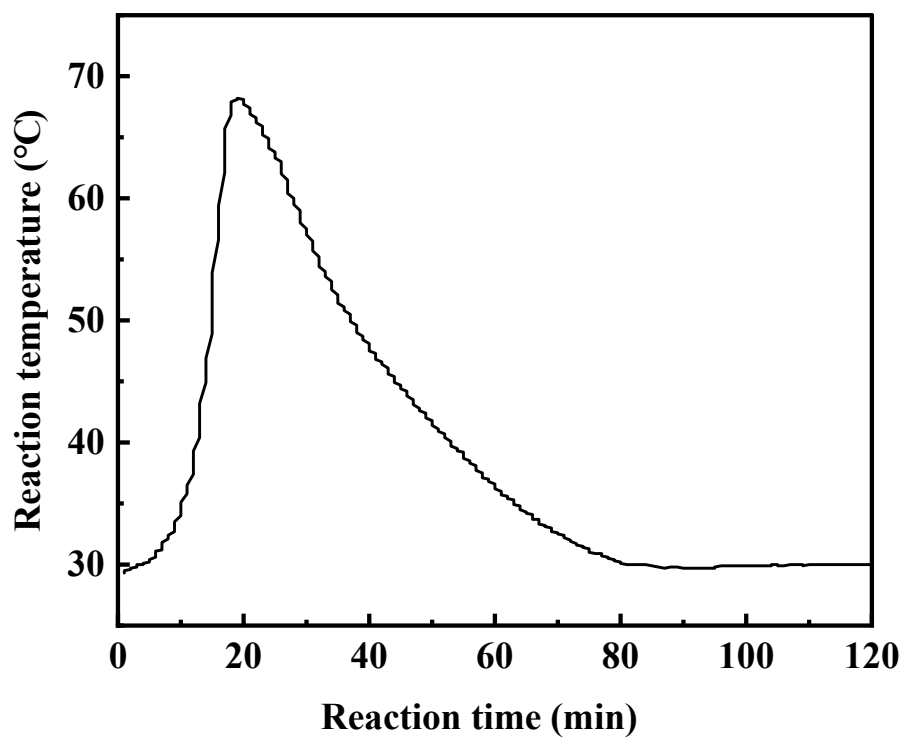

Fig. S22 Reaction temperature monitoring

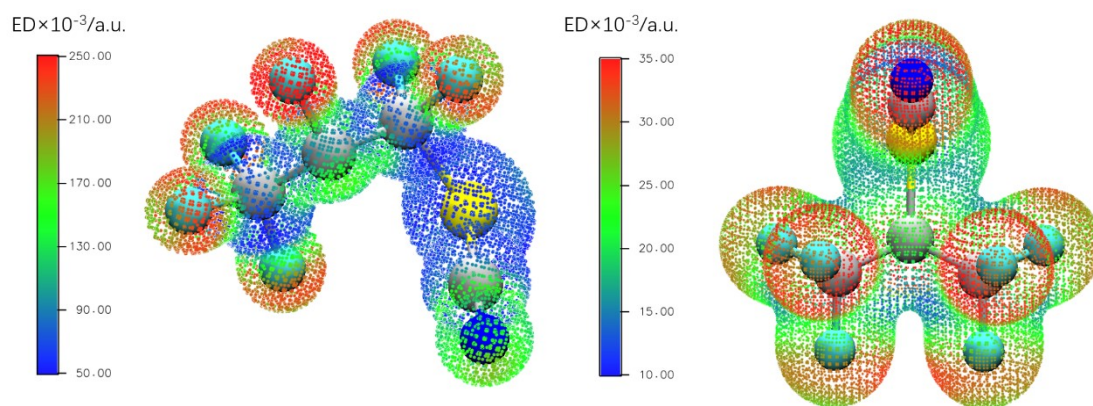

Fig. S23 The electron density distribution around the molecular surface, which is defined at the Kohn-Sham potential equaling to the negative value of first ionization energy (a.u.).

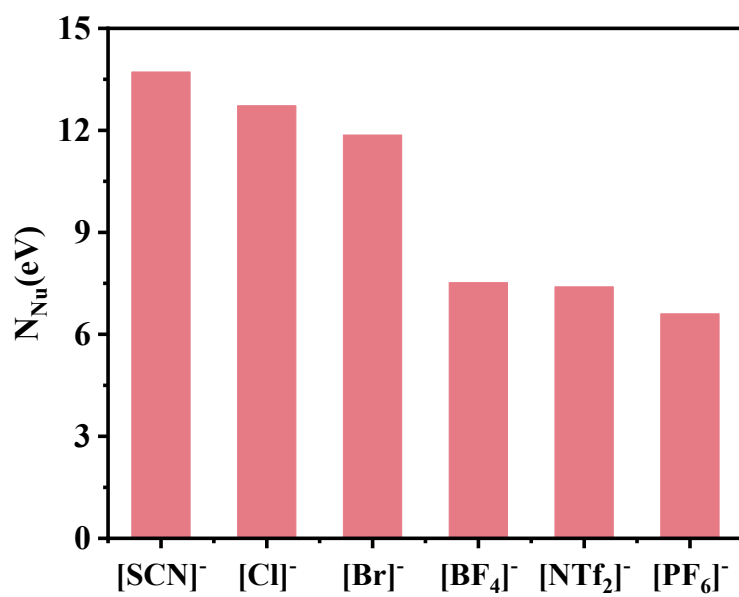

Fig. S24 Nucleophilic index of anions nucleophilic index ( $N_{Nu}$ ).
